# Supplementary material for: Intravenous Administration of Adipose-Derived Stem Cell Protein Extracts Improves Neurological Deficits in a Rat Model of Stroke
Source: Stem Cells Int. 2017 Feb 7;2017:2153629. doi: 10.1155/2017/2153629 (PMC5318632; doi:10.1155/2017/2153629)
Supplement: Supplementary file 1 — Supplementary Figure 1. Measurement of Neurological deficits using Roger's scaling system. (A) tMCAO was induced using SD rat. Protein extract from ADSCs (ADSC-E) was injected either through IV, IC or IP after the operation. The impact of different delivery routes on the therapeutic effect of ADSC-E during stroke were measured by Roger's scaling system (n=8/group). (B) tMCAO was induced using SD rat. Either ADSC or ADSC-E was injected through IV. The therapeutic characteristics between ADSC and ADSC-E on behavior change were measured by Roger's scaling system (n=8/group).Supplementary Figure 2. The impact of different components of ADSC during stroke. tMCAO was induced using SD rat. Different components (ADSC-E, Heated-ADSC-E, RNA and DNA) of ADSC were injected through IV. (A, B). Functional outcome was measured by mNSS Scaling system (n=4/group) (A) and Roger's Scaling system (n=4/group) (B). (C, D). Lesion size was measured using TTC staining at day 1 (n=4/group). [file 2153629.f1.zip]

Archive with 3 entries (2 files):
- 2153629.f1/
- 2153629.f1/Supplementary Figure 1_SCI_1813239.eps
- 2153629.f1/Supplementary Figure 2_SCI_1813240.eps
